# Supplementary material for: Short-Scale Construction Using Meta-Analytic Ant Colony Optimization
Source: Atypon-hosted journal article supplement (doi:10.1027/1015-5759/a000818), 2024-03-26
Supplement: 1015-5759_a000818_esm1.pdf [file 1015-5759_a000818_esm1.pdf]

Supplement material for

**Short-Scale Construction Using Meta-Analytic Ant Colony Optimization:  
A Demonstration With the Need For Cognition Scale**

**Overview**

|                                                                                               |    |
|-----------------------------------------------------------------------------------------------|----|
| Table E1. Items of the Risk of Bias Scale.....                                                | 2  |
| Table E2. Pooled Correlations With Standard Errors and Random Effects of All Studies .....    | 3  |
| Table E3. Meta-Analytic Exploratory Factor Loading Pattern for the NCS-18 .....               | 5  |
| Table E4. Parameter Estimates of the NCS-18.....                                              | 7  |
| Table E5. Short Versions Derived With MASEM ACO.....                                          | 9  |
| Table E6. Pooled Correlations of Three Large Studies vs. all Other Studies .....              | 10 |
| Table E7. Measurement Models for the NCS-18 of Three Large Studies vs. all Other Studies..... | 11 |
| Figure E1. Correlation Matrix of All Correlation Matrices .....                               | 12 |
| Figure E2. Differences in Correlations With vs. Without Outliers.....                         | 13 |

**Table E1**

*Items of the Risk of Bias Scale*

| Items                                                                                                                            | Response scale                                                                                                                                                                                                                                                |
|----------------------------------------------------------------------------------------------------------------------------------|---------------------------------------------------------------------------------------------------------------------------------------------------------------------------------------------------------------------------------------------------------------|
| 1. Was the sampling frame largely representative of the studied population?                                                      | 0 = Yes, they are identical or the sampling frame is representative to a great extent (e.g., telephone directory)<br>1 = No, the sampling frame represents a much more specific group than the studied population or not reported or no population specified. |
| 2. Were appropriate methods utilized for participant recruitment?                                                                | 0 = Yes, with relatively low sampling bias (e.g., random selection)<br>1 = No, high potential for sampling bias (e.g., convenience sample) or not reported.                                                                                                   |
| 3. Is the exclusion rate of participants acceptable and falls below 10%?                                                         | 0 = Yes, equal or below 10%.<br>1 = No, more than 10% or not reported.                                                                                                                                                                                        |
| 4. Is the final sample size sufficient (i.e., at least 250 for correlations or 500 for factor loadings) for the research design? | 0 = Yes, equal or above the criterion.<br>1 = No, less than the criterion or not reported.                                                                                                                                                                    |
| 5. Are the characteristics of the sample reported (demographic variables)?                                                       | 0 = Yes, both age and gender are reported.<br>1 = No, one or both of them are not reported.                                                                                                                                                                   |
| 6. Are adequate effect sizes (i.e., correlations) available?                                                                     | 0 = Raw data or correlations are available.<br>1 = Factor loadings are available.                                                                                                                                                                             |
| 7. Was the study conducted in a controlled setting?                                                                              | 0 = Controlled environment (e.g., laboratory, interviewer-led)<br>1 = Uncontrolled environment (e.g., online) or not reported                                                                                                                                 |
| 8. Are data cleaning and management procedures reported?                                                                         | 0 = Yes, reporting of either missing data, outliers, or invalid responses.<br>1 = No, all unreported.                                                                                                                                                         |

*Note.* The quality of each study was rated with an adapted version of the risk of bias scale by Nudelman and Otto (2020). In comparison to the original assessment, we made two changes to adapt it to the specific conditions of the present meta-analysis (see also Gnambs & Schroeders, 2023, for a similar procedure): (a) For Item #4, we chose thresholds of 250 and 500 participants as sufficient sample sizes for correlations and factor loadings, respectively, because previous research showed that correlations and loadings tend to stabilize at these values (Hirschfeld et al., 2014; Schoenbrodt & Perugini, 2013). (b) For item #6, we decided to refer to the available data type (i.e., raw data or correlations versus factor loadings patterns) instead of the reported reliability of the measure.

**Table E2**

*Pooled Correlations With Standard Errors and Random Effects of All Studies*

|                            | I01  | I02  | I03 <sup>#</sup> | I04 <sup>#</sup> | I05 <sup>#</sup> | I06  | I07 <sup>#</sup> | I08 <sup>#</sup> | I09 <sup>#</sup> | I10  | I11  | I12 <sup>#</sup> | I13  | I14  | I15  | I16 <sup>#</sup> | I17 <sup>#</sup> | I18  |
|----------------------------|------|------|------------------|------------------|------------------|------|------------------|------------------|------------------|------|------|------------------|------|------|------|------------------|------------------|------|
| <i>Pooled correlations</i> |      |      |                  |                  |                  |      |                  |                  |                  |      |      |                  |      |      |      |                  |                  |      |
| I01                        | 1.00 |      |                  |                  |                  |      |                  |                  |                  |      |      |                  |      |      |      |                  |                  |      |
| I02                        | .550 | 1.00 |                  |                  |                  |      |                  |                  |                  |      |      |                  |      |      |      |                  |                  |      |
| I03 <sup>#</sup>           | .287 | .331 | 1.00             |                  |                  |      |                  |                  |                  |      |      |                  |      |      |      |                  |                  |      |
| I04 <sup>#</sup>           | .334 | .357 | .507             | 1.00             |                  |      |                  |                  |                  |      |      |                  |      |      |      |                  |                  |      |
| I05 <sup>#</sup>           | .269 | .305 | .463             | .539             | 1.00             |      |                  |                  |                  |      |      |                  |      |      |      |                  |                  |      |
| I06                        | .421 | .450 | .268             | .273             | .228             | 1.00 |                  |                  |                  |      |      |                  |      |      |      |                  |                  |      |
| I07 <sup>#</sup>           | .223 | .237 | .374             | .413             | .400             | .214 | 1.00             |                  |                  |      |      |                  |      |      |      |                  |                  |      |
| I08 <sup>#</sup>           | .208 | .227 | .309             | .370             | .337             | .192 | .327             | 1.00             |                  |      |      |                  |      |      |      |                  |                  |      |
| I09 <sup>#</sup>           | .287 | .279 | .353             | .465             | .392             | .229 | .372             | .383             | 1.00             |      |      |                  |      |      |      |                  |                  |      |
| I10                        | .377 | .449 | .286             | .293             | .254             | .375 | .194             | .175             | .201             | 1.00 |      |                  |      |      |      |                  |                  |      |
| I11                        | .440 | .505 | .304             | .334             | .296             | .394 | .215             | .212             | .268             | .466 | 1.00 |                  |      |      |      |                  |                  |      |
| I12 <sup>#</sup>           | .247 | .280 | .437             | .439             | .411             | .238 | .336             | .290             | .329             | .270 | .328 | 1.00             |      |      |      |                  |                  |      |
| I13                        | .447 | .446 | .239             | .267             | .207             | .408 | .185             | .161             | .235             | .368 | .428 | .217             | 1.00 |      |      |                  |                  |      |
| I14                        | .368 | .388 | .268             | .263             | .243             | .364 | .207             | .170             | .209             | .385 | .417 | .274             | .408 | 1.00 |      |                  |                  |      |
| I15                        | .429 | .444 | .248             | .289             | .237             | .367 | .193             | .171             | .238             | .394 | .418 | .231             | .410 | .372 | 1.00 |                  |                  |      |
| I16 <sup>#</sup>           | .203 | .207 | .309             | .359             | .337             | .184 | .289             | .279             | .323             | .173 | .191 | .303             | .159 | .143 | .152 | 1.00             |                  |      |
| I17 <sup>#</sup>           | .227 | .238 | .350             | .402             | .374             | .199 | .355             | .305             | .347             | .209 | .263 | .380             | .176 | .195 | .200 | .336             | 1.00             |      |
| I18                        | .226 | .256 | .147             | .141             | .127             | .293 | .137             | .076             | .097             | .275 | .263 | .136             | .246 | .282 | .243 | .064             | .115             | 1.00 |

(table continued on next page)

|                  | I01                                                                                     | I02  | I03 <sup>#</sup> | I04 <sup>#</sup> | I05 <sup>#</sup> | I06  | I07 <sup>#</sup> | I08 <sup>#</sup> | I09 <sup>#</sup> | I10  | I11  | I12 <sup>#</sup> | I13  | I14  | I15  | I16 <sup>#</sup> | I17 <sup>#</sup> | I18  |
|------------------|-----------------------------------------------------------------------------------------|------|------------------|------------------|------------------|------|------------------|------------------|------------------|------|------|------------------|------|------|------|------------------|------------------|------|
|                  | <i>Standard errors (lower off-diagonal) and random effects (SD; upper off-diagonal)</i> |      |                  |                  |                  |      |                  |                  |                  |      |      |                  |      |      |      |                  |                  |      |
| I01              |                                                                                         | .089 | .048             | .049             | .046             | .091 | .040             | .035             | .038             | .074 | .060 | .046             | .073 | .067 | .067 | .033             | .037             | .048 |
| I02              | .010                                                                                    |      | .062             | .049             | .051             | .084 | .053             | .031             | .037             | .076 | .077 | .048             | .069 | .078 | .067 | .031             | .032             | .051 |
| I03 <sup>#</sup> | .007                                                                                    | .008 |                  | .073             | .073             | .059 | .095             | .054             | .051             | .064 | .061 | .091             | .048 | .053 | .058 | .050             | .066             | .026 |
| I04 <sup>#</sup> | .007                                                                                    | .007 | .009             |                  | .074             | .049 | .090             | .062             | .056             | .042 | .055 | .071             | .038 | .026 | .042 | .049             | .064             | .000 |
| I05 <sup>#</sup> | .007                                                                                    | .007 | .009             | .009             |                  | .055 | .088             | .062             | .05              | .048 | .046 | .076             | .031 | .030 | .036 | .044             | .066             | .019 |
| I06              | .011                                                                                    | .010 | .008             | .007             | .008             |      | .062             | .044             | .037             | .080 | .068 | .037             | .085 | .081 | .078 | .040             | .028             | .085 |
| I07 <sup>#</sup> | .006                                                                                    | .008 | .011             | .011             | .011             | .008 |                  | .079             | .071             | .073 | .056 | .086             | .039 | .048 | .052 | .078             | .092             | .066 |
| I08 <sup>#</sup> | .006                                                                                    | .006 | .008             | .008             | .008             | .007 | .010             |                  | .074             | .032 | .037 | .068             | .028 | .035 | .018 | .054             | .059             | .048 |
| I09 <sup>#</sup> | .006                                                                                    | .006 | .007             | .007             | .007             | .006 | .009             | .009             |                  | .052 | .051 | .058             | .030 | .028 | .036 | .053             | .053             | .021 |
| I10              | .009                                                                                    | .009 | .009             | .007             | .007             | .010 | .009             | .006             | .007             |      | .108 | .058             | .068 | .072 | .068 | .051             | .04              | .077 |
| I11              | .008                                                                                    | .009 | .008             | .007             | .007             | .009 | .008             | .006             | .007             | .012 |      | .095             | .070 | .065 | .066 | .049             | .051             | .072 |
| I12 <sup>#</sup> | .007                                                                                    | .007 | .011             | .009             | .009             | .006 | .011             | .009             | .008             | .008 | .011 |                  | .038 | .051 | .037 | .050             | .071             | .022 |
| I13              | .009                                                                                    | .009 | .007             | .006             | .006             | .010 | .006             | .006             | .006             | .009 | .009 | .006             |      | .095 | .062 | .041             | .030             | .063 |
| I14              | .009                                                                                    | .010 | .007             | .005             | .006             | .010 | .007             | .006             | .005             | .009 | .008 | .007             | .011 |      | .075 | .016             | .021             | .065 |
| I15              | .009                                                                                    | .009 | .008             | .006             | .006             | .010 | .007             | .005             | .006             | .009 | .008 | .006             | .008 | .009 |      | .044             | .036             | .055 |
| I16 <sup>#</sup> | .006                                                                                    | .006 | .007             | .007             | .007             | .007 | .010             | .008             | .007             | .007 | .007 | .007             | .007 | .005 | .007 |                  | .056             | .047 |
| I17 <sup>#</sup> | .006                                                                                    | .006 | .009             | .008             | .009             | .006 | .011             | .008             | .007             | .007 | .007 | .009             | .006 | .005 | .006 | .008             |                  | .035 |
| I18              | .007                                                                                    | .007 | .005             | .003             | .005             | .011 | .009             | .007             | .005             | .010 | .009 | .005             | .008 | .009 | .008 | .007             | .006             |      |

Note. N = 90,215 from 87 samples. # negatively keyed item

**Table E3**

*Meta-Analytic Exploratory Factor Loading Pattern for the NCS-18*

| Item             |                                                                                                                                           | <i>Single factor model</i> |       | <i>Oblique two-factor model</i> |            |       |
|------------------|-------------------------------------------------------------------------------------------------------------------------------------------|----------------------------|-------|---------------------------------|------------|-------|
|                  |                                                                                                                                           | Factor 1                   | $h^2$ | Factor 1                        | Factor 2   | $h^2$ |
| I01              | I would prefer complex to simple problems.                                                                                                | <b>.64</b>                 | .41   | <b>.65</b>                      | .03        | .45   |
| I02              | I like to have the responsibility of handling a situation that requires a lot of thinking.                                                | <b>.69</b>                 | .47   | <b>.70</b>                      | .04        | .52   |
| I03 <sup>#</sup> | Thinking is not my idea of fun.                                                                                                           | <b>.63</b>                 | .40   | .07                             | <b>.60</b> | .42   |
| I04 <sup>#</sup> | I would rather do something that requires little thought than something that is sure to challenge my thinking abilities.                  | <b>.68</b>                 | .46   | .04                             | <b>.71</b> | .54   |
| I05 <sup>#</sup> | I try to anticipate and avoid situations where there is likely chance I will have to think in depth about something.                      | <b>.60</b>                 | .36   | -.01                            | <b>.69</b> | .46   |
| I06              | I find satisfaction in deliberating hard and for long hours.                                                                              | <b>.60</b>                 | .36   | <b>.62</b>                      | .00        | .38   |
| I07 <sup>#</sup> | I only think as hard as I have to.                                                                                                        | <b>.55</b>                 | .30   | -.04                            | <b>.61</b> | .34   |
| I08 <sup>#</sup> | I prefer to think about small, daily projects to long-term ones.                                                                          | <b>.46</b>                 | .21   | -.04                            | <b>.56</b> | .28   |
| I09 <sup>#</sup> | I like tasks that require little thought once I've learned them.                                                                          | <b>.56</b>                 | .31   | .01                             | <b>.61</b> | .37   |
| I10              | The idea of relying on thought to make my way to the top appeals to me.                                                                   | <b>.58</b>                 | .34   | <b>.62</b>                      | .01        | .39   |
| I11              | I really enjoy a task that involves coming up with new solutions to problems.                                                             | <b>.66</b>                 | .44   | <b>.65</b>                      | .06        | .47   |
| I12 <sup>#</sup> | Learning new ways to think doesn't excite me very much.                                                                                   | <b>.60</b>                 | .36   | .06                             | <b>.57</b> | .37   |
| I13              | I prefer my life to be filled with puzzles that I must solve.                                                                             | <b>.55</b>                 | .30   | <b>.68</b>                      | -.06       | .41   |
| I14              | The notion of thinking abstractly is appealing to me.                                                                                     | <b>.56</b>                 | .32   | <b>.60</b>                      | .00        | .36   |
| I15              | I would prefer a task that is intellectual, difficult, and important to one that is somewhat important but does not require much thought. | <b>.56</b>                 | .31   | <b>.63</b>                      | -.02       | .39   |
| I16 <sup>#</sup> | I feel relief rather than satisfaction after completing a task that required a lot of mental effort.                                      | <b>.42</b>                 | .17   | -.06                            | <b>.55</b> | .27   |
| I17 <sup>#</sup> | It's enough for me that something gets the job done; I don't care how or why it works.                                                    | <b>.52</b>                 | .27   | -.03                            | <b>.60</b> | .34   |
| I18              | I usually end up deliberating about issues even when they do not affect me personally.                                                    | .33                        | .11   | <b>.46</b>                      | -.09       | .17   |

(table continued on the next page)

|                                  |      |      |      |
|----------------------------------|------|------|------|
| Eigenvalue                       | 5.89 | 3.55 | 3.39 |
| Proportion of variance           | 33%  | 20%  | 19%  |
| Proportion of explained variance | 100% | 51%  | 49%  |

---

*Note.*  $N = 90,215$  from 87 samples. # negatively keyed item;  $h^2$  = Communality. Exploratory weighted least square factor analysis with direct oblimin rotation based on the pooled correlation matrix. The factor correlation for the oblique model was  $r = .59$ . All items were recoded in such a way that higher values indicate a higher need for cognition. Salient factor loadings with absolute values greater than .40 are in bold.

**Table E4**

*Parameter Estimates of Competing Measurement Models for the NCS-18*

| Factor(s)      | Model 1 |  | Model 2               |                    | Model 3        |          |                 |     |                  |     |
|----------------|---------|--|-----------------------|--------------------|----------------|----------|-----------------|-----|------------------|-----|
|                | NFC     |  | NFC <sub>pos</sub>    | NFC <sub>neg</sub> | NFC            |          |                 |     |                  |     |
| $\lambda_1$    | .62     |  | $\lambda_1$           | .68                | $\lambda_1$    | .68      | $\theta_{3,4}$  | .31 | $\theta_{7,12}$  | .21 |
| $\lambda_2$    | .66     |  | $\lambda_2$           | .74                | $\lambda_2$    | .74      | $\theta_{3,5}$  | .29 | $\theta_{8,12}$  | .18 |
| $\lambda_3$    | .62     |  | $\lambda_3$           |                    | $\lambda_3$    | .43      | $\theta_{4,5}$  | .36 | $\theta_{9,12}$  | .18 |
| $\lambda_4$    | .67     |  | $\lambda_4$           |                    | $\lambda_4$    | .46      | $\theta_{3,7}$  | .24 | $\theta_{12,16}$ | .20 |
| $\lambda_5$    | .60     |  | $\lambda_5$           |                    | $\lambda_5$    | .39      | $\theta_{4,7}$  | .27 | $\theta_{3,16}$  | .19 |
| $\lambda_6$    | .53     |  | $\lambda_6$           | .62                | $\lambda_6$    | .62      | $\theta_{5,7}$  | .27 | $\theta_{4,16}$  | .23 |
| $\lambda_7$    | .49     |  | $\lambda_7$           |                    | $\lambda_7$    | .32      | $\theta_{3,8}$  | .18 | $\theta_{5,16}$  | .23 |
| $\lambda_8$    | .45     |  | $\lambda_8$           |                    | $\lambda_8$    | .29      | $\theta_{4,8}$  | .24 | $\theta_{7,16}$  | .20 |
| $\lambda_9$    | .56     |  | $\lambda_9$           |                    | $\lambda_9$    | .38      | $\theta_{5,8}$  | .22 | $\theta_{8,16}$  | .20 |
| $\lambda_{10}$ | .56     |  | $\lambda_{10}$        | .63                | $\lambda_{10}$ | .63      | $\theta_{7,8}$  | .23 | $\theta_{9,16}$  | .22 |
| $\lambda_{11}$ | .65     |  | $\lambda_{11}$        | .70                | $\lambda_{11}$ | .70      | $\theta_{3,9}$  | .19 | $\theta_{12,17}$ | .25 |
| $\lambda_{12}$ | .56     |  | $\lambda_{12}$        |                    | $\lambda_{12}$ | .39      | $\theta_{4,9}$  | .29 | $\theta_{16,17}$ | .25 |
| $\lambda_{13}$ | .54     |  | $\lambda_{13}$        | .61                | $\lambda_{13}$ | .61      | $\theta_{5,9}$  | .24 | $\theta_{3,17}$  | .21 |
| $\lambda_{14}$ | .52     |  | $\lambda_{14}$        | .60                | $\lambda_{14}$ | .60      | $\theta_{7,9}$  | .25 | $\theta_{4,17}$  | .25 |
| $\lambda_{15}$ | .55     |  | $\lambda_{15}$        | .62                | $\lambda_{15}$ | .62      | $\theta_{8,9}$  | .27 | $\theta_{5,17}$  | .24 |
| $\lambda_{16}$ | .44     |  | $\lambda_{16}$        |                    | $\lambda_{16}$ | .27      | $\theta_{3,12}$ | .27 | $\theta_{7,17}$  | .25 |
| $\lambda_{17}$ | .50     |  | $\lambda_{17}$        |                    | $\lambda_{17}$ | .33      | $\theta_{4,12}$ | .26 | $\theta_{8,17}$  | .21 |
| $\lambda_{18}$ | .29     |  | $\lambda_{18}$        | .36                | $\lambda_{18}$ | .36      | $\theta_{5,12}$ | .26 | $\theta_{9,17}$  | .22 |
| $\omega$       | .89     |  | $r_{\text{pos, neg}}$ | .60                |                |          |                 |     |                  |     |
|                |         |  |                       | .85                |                | .85      |                 |     |                  |     |
| Model fit      |         |  |                       |                    |                |          |                 |     |                  |     |
| $\chi^2$       | 9,515.5 |  | $\chi^2$              | 1,486.0            |                | $\chi^2$ | 927.7           |     |                  |     |
| $df$           | 135     |  | $df$                  | 134                |                | $df$     | 99              |     |                  |     |
| NNFI           | .805    |  | NNFI                  | .972               |                | NNFI     | .977            |     |                  |     |
| CFI            | .828    |  | CFI                   | .975               |                | CFI      | .985            |     |                  |     |
| RMSEA          | .028    |  | RMSEA                 | .011               |                | RMSEA    | .009            |     |                  |     |
| SRMR           | .081    |  | SRMR                  | .056               |                | SRMR     | .019            |     |                  |     |

| Factor(s)      | Model 4 |                    |                    | Model 5        |                    | Model 6     |                |         |      |
|----------------|---------|--------------------|--------------------|----------------|--------------------|-------------|----------------|---------|------|
|                | NFC     | NFC <sub>pos</sub> | NFC <sub>neg</sub> | NFC            | NFC <sub>neg</sub> | NFC         | Acqui.         |         |      |
| $\lambda_1$    | .43     | .51                |                    | $\lambda_1$    | .68                | $\lambda_1$ | .62            | -.28    |      |
| $\lambda_2$    | .47     | .55                |                    | $\lambda_2$    | .74                | $\lambda_2$ | .66            | -.28    |      |
| $\lambda_3$    | .70     |                    | -.09               | $\lambda_3$    | .43                | .47         | $\lambda_3$    | .60     | .28  |
| $\lambda_4$    | .75     |                    | .09                | $\lambda_4$    | .46                | .59         | $\lambda_4$    | .67     | .28  |
| $\lambda_5$    | .66     |                    | .11                | $\lambda_5$    | .39                | .55         | $\lambda_5$    | .59     | .28  |
| $\lambda_6$    | .38     | .49                |                    | $\lambda_6$    | .62                |             | $\lambda_6$    | .56     | -.28 |
| $\lambda_7$    | .54     |                    | .24                | $\lambda_7$    | .32                | .50         | $\lambda_7$    | .50     | .28  |
| $\lambda_8$    | .47     |                    | .30                | $\lambda_8$    | .29                | .43         | $\lambda_8$    | .46     | .28  |
| $\lambda_9$    | .58     |                    | .29                | $\lambda_9$    | .38                | .48         | $\lambda_9$    | .55     | .28  |
| $\lambda_{10}$ | .39     | .48                |                    | $\lambda_{10}$ | .63                |             | $\lambda_{10}$ | .56     | -.28 |
| $\lambda_{11}$ | .45     | .51                |                    | $\lambda_{11}$ | .70                |             | $\lambda_{11}$ | .63     | -.28 |
| $\lambda_{12}$ | .63     |                    | -.01               | $\lambda_{12}$ | .40                | .45         | $\lambda_{12}$ | .56     | .28  |
| $\lambda_{13}$ | .35     | .54                |                    | $\lambda_{13}$ | .61                |             | $\lambda_{13}$ | .54     | -.28 |
| $\lambda_{14}$ | .37     | .48                |                    | $\lambda_{14}$ | .60                |             | $\lambda_{14}$ | .54     | -.28 |
| $\lambda_{15}$ | .37     | .50                |                    | $\lambda_{15}$ | .62                |             | $\lambda_{15}$ | .55     | -.28 |
| $\lambda_{16}$ | .46     |                    | .24                | $\lambda_{16}$ | .27                | .43         | $\lambda_{16}$ | .44     | .28  |
| $\lambda_{17}$ | .54     |                    | .21                | $\lambda_{17}$ | .33                | .48         | $\lambda_{17}$ | .51     | .28  |
| $\lambda_{18}$ | .19     | .35                |                    | $\lambda_{18}$ | .36                |             | $\lambda_{18}$ | .33     | -.28 |
| $\omega$       | .85     | .74                | .18                |                | .85                | .74         |                | .89     |      |
| Model fit      |         |                    |                    |                |                    |             |                |         |      |
| $\chi^2$       | 895.2   |                    |                    | $\chi^2$       | 1,243.5            |             | $\chi^2$       | 1,242.0 |      |
| <i>df</i>      | 117     |                    |                    | <i>df</i>      | 126                |             | <i>df</i>      | 134     |      |
| NNFI           | .981    |                    |                    | NNFI           | .975               |             | NNFI           | .977    |      |
| CFI            | .986    |                    |                    | CFI            | .980               |             | CFI            | .980    |      |
| RMSEA          | .009    |                    |                    | RMSEA          | .010               |             | RMSEA          | .010    |      |
| SRMR           | .019    |                    |                    | SRMR           | .023               |             | SRMR           | .023    |      |

Note.  $N = 90,215$  from 87 samples.,  $\lambda$  = factor loadings;  $\theta$  = residual correlations,  $\omega$  = reliability index. CFI = comparative fit index; NNFI = non-normed fit index; RMSEA = root mean square error of approximation; SRMR = standardized root mean residual; Acqui. = Acquiescence.



**Table E5**

*Short Versions Derived With MASEM ACO*

| Number of Items | Selected Items |    |                 |                 |                 |    |                 |                 |                 |     |     |                  |     |     |     |                  |                  |     |
|-----------------|----------------|----|-----------------|-----------------|-----------------|----|-----------------|-----------------|-----------------|-----|-----|------------------|-----|-----|-----|------------------|------------------|-----|
|                 | I1             | I2 | I3 <sup>#</sup> | I4 <sup>#</sup> | I5 <sup>#</sup> | I6 | I7 <sup>#</sup> | I8 <sup>#</sup> | I9 <sup>#</sup> | I10 | I11 | I12 <sup>#</sup> | I13 | I14 | I15 | I16 <sup>#</sup> | I17 <sup>#</sup> | I18 |
| 4               | x              | x  |                 | x               | x               |    |                 |                 |                 |     |     |                  |     |     |     |                  |                  |     |
| 5               | x              | x  | x               | x               |                 |    |                 |                 |                 |     | x   |                  |     |     |     |                  |                  |     |
| 6               | x              | x  | x               | x               | x               |    |                 |                 |                 |     | x   |                  |     |     |     |                  |                  |     |
| 7               | x              | x  | x               | x               | x               |    |                 |                 |                 |     | x   |                  |     |     | x   |                  |                  |     |
| 8               |                | x  | x               | x               | x               |    |                 |                 |                 | x   | x   | x                |     |     | x   |                  |                  |     |
| 9               | x              | x  | x               | x               | x               |    | x               |                 |                 | x   | x   |                  |     |     | x   |                  |                  |     |
| 10              |                | x  | x               | x               | x               |    | x               |                 |                 | x   | x   | x                | x   |     | x   |                  |                  |     |
| 11              |                | x  | x               | x               | x               | x  | x               |                 |                 | x   | x   |                  |     | x   | x   |                  |                  | x   |
| 12              |                | x  | x               | x               | x               | x  | x               |                 |                 | x   | x   | x                | x   |     | x   |                  |                  | x   |
| 13              | x              | x  | x               | x               | x               | x  | x               |                 |                 | x   | x   | x                | x   |     | x   |                  |                  | x   |
| 14              | x              | x  |                 | x               | x               | x  | x               | x               | x               | x   | x   |                  |     | x   | x   | x                | x                | x   |
| 15              | x              | x  |                 | x               | x               | x  | x               | x               | x               | x   | x   |                  | x   | x   | x   | x                | x                | x   |

*Note.* # negatively keyed item. The underlying model was an acquiescence model.

**Table E6**

*Pooled Correlations of Three Large Studies vs. all Other Studies*

|                  | I01  | I02  | I03 <sup>#</sup> | I04 <sup>#</sup> | I05 <sup>#</sup> | I06  | I07 <sup>#</sup> | I08 <sup>#</sup> | I09 <sup>#</sup> | I10  | I11  | I12 <sup>#</sup> | I13  | I14  | I15  | I16 <sup>#</sup> | I17 <sup>#</sup> | I18  |
|------------------|------|------|------------------|------------------|------------------|------|------------------|------------------|------------------|------|------|------------------|------|------|------|------------------|------------------|------|
| I01              |      | .631 | .226             | .355             | .310             | .402 | .202             | .251             | .311             | .366 | .460 | .270             | .410 | .399 | .379 | .192             | .247             | .211 |
| I02              | .539 |      | .245             | .370             | .310             | .439 | .196             | .259             | .309             | .429 | .530 | .270             | .411 | .388 | .398 | .178             | .237             | .235 |
| I03 <sup>#</sup> | .308 | .412 |                  | .443             | .431             | .211 | .242             | .294             | .297             | .172 | .234 | .320             | .132 | .186 | .147 | .251             | .265             | .100 |
| I04 <sup>#</sup> | .356 | .449 | .224             |                  | .593             | .299 | .286             | .376             | .463             | .258 | .365 | .361             | .216 | .254 | .239 | .301             | .343             | .135 |
| I05 <sup>#</sup> | .333 | .428 | .390             | .332             |                  | .275 | .302             | .377             | .413             | .215 | .327 | .354             | .176 | .233 | .194 | .303             | .346             | .123 |
| I06              | .358 | .213 | .370             | .292             | .294             |      | .215             | .247             | .266             | .368 | .411 | .251             | .406 | .384 | .291 | .151             | .211             | .291 |
| I07 <sup>#</sup> | .526 | .195 | .381             | .398             | .336             | .370 |                  | .323             | .324             | .146 | .182 | .251             | .164 | .172 | .118 | .225             | .249             | .120 |
| I08 <sup>#</sup> | .263 | .216 | .455             | .223             | .292             | .430 | .392             |                  | .463             | .181 | .249 | .288             | .163 | .221 | .160 | .259             | .294             | .109 |
| I09 <sup>#</sup> | .305 | .316 | .319             | .202             | .336             | .234 | .417             | .174             |                  | .187 | .290 | .322             | .214 | .226 | .216 | .308             | .338             | .082 |
| I10              | .475 | .369 | .308             | .266             | .455             | .362 | .288             | .250             | .378             |      | .528 | .197             | .378 | .359 | .366 | .088             | .157             | .236 |
| I11              | .535 | .332 | .268             | .460             | .454             | .389 | .394             | .403             | .350             | .184 |      | .322             | .439 | .421 | .397 | .173             | .271             | .265 |
| I12 <sup>#</sup> | .428 | .178 | .384             | .247             | .272             | .295 | .439             | .425             | .196             | .156 | .199 |                  | .176 | .231 | .165 | .276             | .321             | .129 |
| I13              | .458 | .334 | .208             | .286             | .285             | .272 | .454             | .256             | .314             | .185 | .384 | .186             |      | .508 | .361 | .089             | .156             | .243 |
| I14              | .285 | .282 | .175             | .467             | .220             | .249 | .282             | .422             | .286             | .225 | .309 | .200             | .167 |      | .358 | .131             | .192             | .270 |
| I15              | .272 | .274 | .210             | .461             | .417             | .367 | .309             | .380             | .332             | .241 | .352 | .219             | .151 | .072 |      | .049             | .145             | .211 |
| I16 <sup>#</sup> | .221 | .372 | .437             | .428             | .192             | .215 | .254             | .213             | .199             | .375 | .227 | .346             | .134 | .106 | .144 |                  | .313             | .002 |
| I17 <sup>#</sup> | .231 | .469 | .502             | .239             | .161             | .156 | .388             | .220             | .204             | .418 | .264 | .230             | .300 | .283 | .247 | .250             |                  | .093 |
| I18              | .246 | .391 | .328             | .364             | .244             | .208 | .214             | .329             | .315             | .384 | .395 | .262             | .141 | .265 | .285 | .086             | .126             |      |

*Note.*  $N(\text{large studies}) = 54,138$ ,  $N(\text{other studies}) = 36,077$ . <sup>#</sup> negatively keyed item. Above the diagonal the correlations of the three large studies are depicted (i.e., study IDs barcelo2023, LISS-Wave1 to LISS-Wave10, hussey2020).

**Table E7**

*Measurement Models for the NCS-18 of Three Large Studies vs. all Other Studies*

| No                | Model                                         | $\chi^2$ | <i>df</i> | CFI  | NNFI | RMSEA             | SRMR | AIC     | BIC     |
|-------------------|-----------------------------------------------|----------|-----------|------|------|-------------------|------|---------|---------|
| Large studies     |                                               |          |           |      |      |                   |      |         |         |
| 1                 | Uni-dimensional model                         | 4,441.6  | 135       | .837 | .816 | .024 [.024; .025] | .085 | 4,171.6 | 2,970.2 |
| 2                 | Two-dimensional model                         | 1,046.2  | 134       | .966 | .961 | .011 [.011; .012] | .040 | 778.2   | -414.3  |
| 3                 | Correlated uniqueness model                   | 672.2    | 99        | .978 | .967 | .010 [.010; .011] | .032 | 474.2   | -406.8  |
| 4                 | Bifactor model with two method factors        | 560.4    | 117       | .983 | .978 | .008 [.008; .009] | .030 | 326.4   | -714.8  |
| 5                 | Bifactor (S-1) model for the neg. keyed items | 907.5    | 126       | .971 | .964 | .011 [.010; .011] | .037 | 655.5   | -465.8  |
| 6                 | Acquiescence model                            | 766.1    | 134       | .976 | .973 | .009 [.009; .010] | .036 | 498.1   | -694.4  |
| Remaining studies |                                               |          |           |      |      |                   |      |         |         |
| 1                 | Uni-dimensional model                         | 6,466.9  | 135       | .843 | .822 | .036 [.035; .037] | .086 | 6,196.9 | 5,050.3 |
| 2                 | Two-dimensional model                         | 1,273.6  | 134       | .972 | .968 | .015 [.015; .016] | .025 | 1,005.6 | -132.5  |
| 3                 | Correlated uniqueness model                   | 740.6    | 99        | .984 | .975 | .013 [.013; .014] | .018 | 542.6   | -298.2  |
| 4                 | Bifactor model with two method factors        | 794.2    | 117       | .983 | .978 | .013 [.012; .014] | .018 | 560.2   | -433.6  |
| 5                 | Bifactor (S-1) model for the neg. keyed items | 982.8    | 126       | .979 | .974 | .014 [.013; .015] | .022 | 730.8   | -339.4  |
| 6                 | Acquiescence model                            | 1,129.2  | 134       | .975 | .972 | .014 [.014; .015] | .024 | 861.2   | -276.9  |

*Note.*  $N$ (large studies) = 54,138,  $N$ (other studies) = 36,077. # negatively keyed item. CFI = comparative fit Index; NNFI = non-normed fit index; RMSEA = root mean square error of approximation; SRMR = standardized root mean residual; AIC = Akaike information criterion; BIC = Bayesian information criterion. Large studies had the following study IDs barce1o2023, LISS-Wave1 to LISS-Wave10, hussey2020.

### Figure E1

Correlation Matrix of All Correlation Matrices

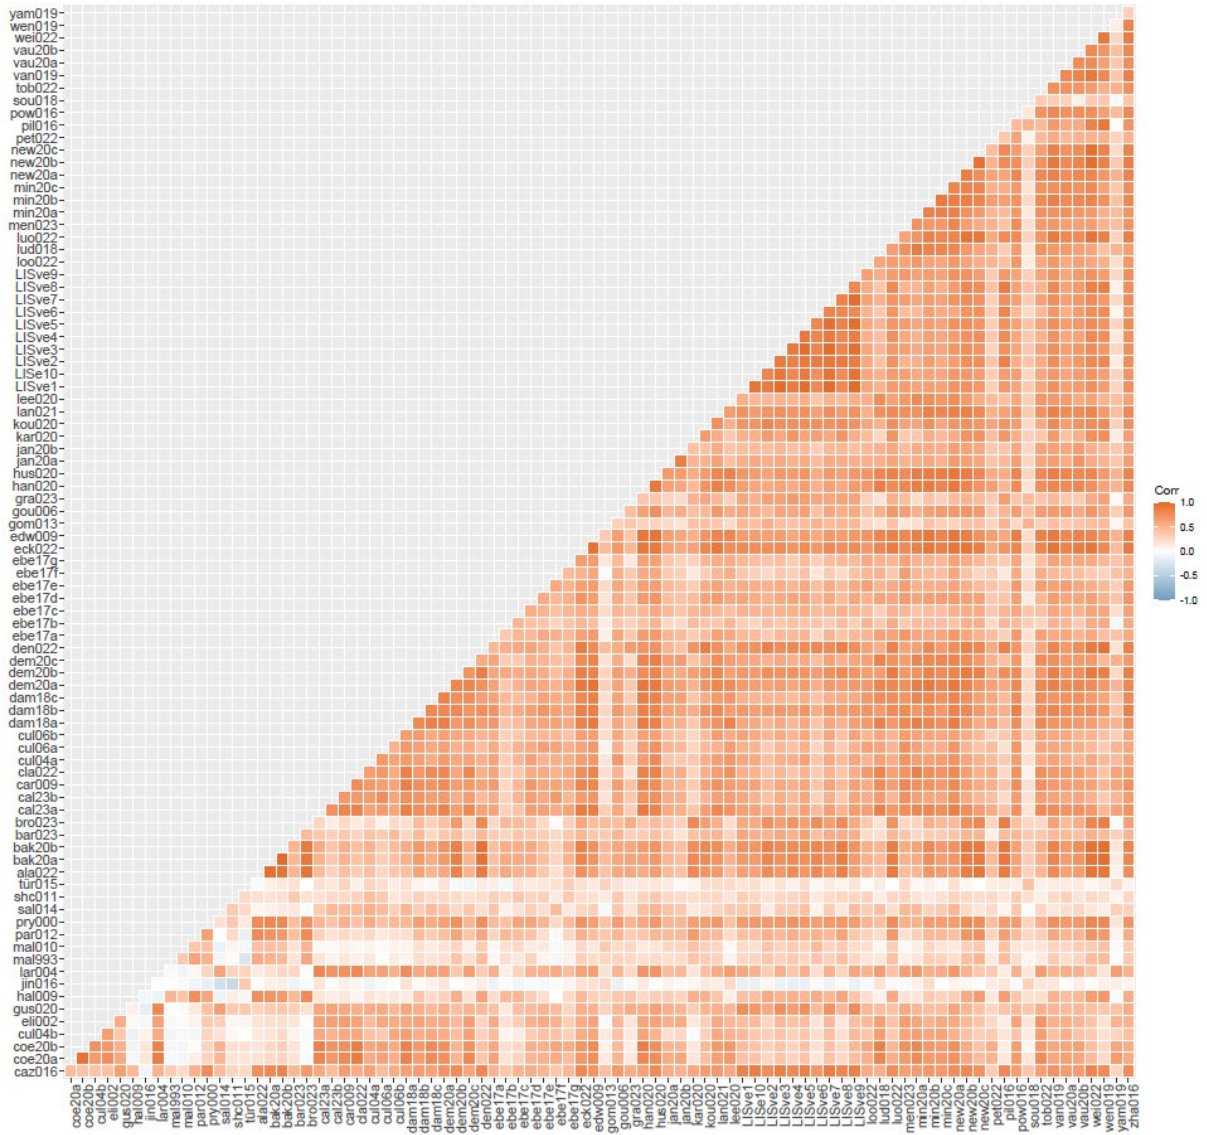

**Figure E2**

*Differences in Correlations With and Without Outliers*

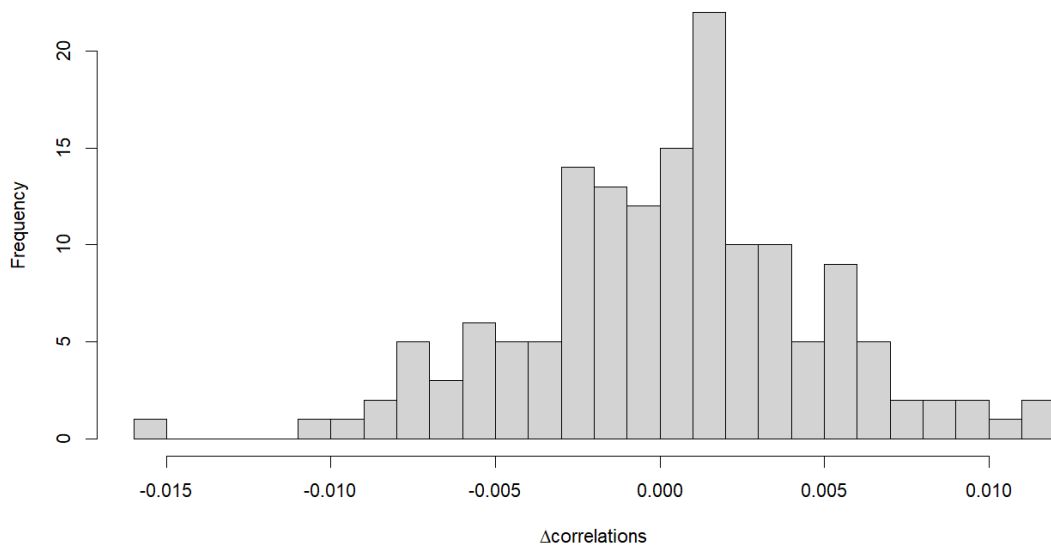

*Note.* Studies with the following study ID (sid) were considered outliers because they correlated on average below .30 with all other studies (see Figure E1): jin2016, maldonado1993, malmborg2010, salama-younes2014, shchebetenko2011, türker2015, and sousa2018.
